# Supplementary material for: Aerobic exercise for vasomotor menopausal symptoms: A cost-utility analysis based on the Active Women trial
Source: PLOS journal article supplement (doi:10.1371/journal.pone.0184328), 2017-09-26
Supplement: S4 (10.1371/journal.pone.0184328.s004) [file journal.pone.0184328.s004]

**S4 Table. Mean per-woman total costs and outcomes—Complete-case analysis (£, 2013/14 prices)**

| <div>Interventions</div> <div>Costs and outcomes</div> | Control group |       | Exercise —<br>Social support |       | Exercise —<br>DVD |       | Difference<br>(Exercise — Social support<br>vs. Control group) |          |       | Difference<br>(Exercise — DVD<br>vs. Control group) |          |       |
|--------------------------------------------------------|---------------|-------|------------------------------|-------|-------------------|-------|----------------------------------------------------------------|----------|-------|-----------------------------------------------------|----------|-------|
|                                                        | Raw<br>Mean   | SE    | Raw<br>Mean                  | SE    | Raw<br>Mean       | SE    | Adjusted<br>Mean§                                              | 95% CIs* |       | Adjusted<br>Mean§                                   | 95% CIs* |       |
| 6 months                                               |               |       |                              |       |                   |       |                                                                |          |       |                                                     |          |       |
| NHS/PSS perspective                                    | 32            | 10    | 79                           | 10    | 92                | 10    | 50                                                             | 16       | 84    | 61                                                  | 40       | 82    |
| Societal perspective                                   | 41            | 13    | 93                           | 13    | 100               | 13    | 56                                                             | 13       | 100   | 60                                                  | 34       | 85    |
| Quality-adjusted life-years (QALYs)                    | 0.356         | 0.007 | 0.355                        | 0.007 | 0.335             | 0.007 | 0.006                                                          | -0.002   | 0.014 | -0.003                                              | -0.010   | 0.005 |
| 12months                                               |               |       |                              |       |                   |       |                                                                |          |       |                                                     |          |       |
| NHS/PSS perspective                                    | 84            | 20    | 84                           | 21    | 109               | 20    | 2                                                              | -66      | 70    | 25                                                  | -37      | 87    |
| Societal perspective                                   | 144           | 34    | 108                          | 35    | 158               | 34    | -26                                                            | -127     | 74    | 19                                                  | -84      | 122   |
| Quality-adjusted life-years (QALYs)                    | 0.701         | 0.015 | 0.708                        | 0.015 | 0.658             | 0.014 | 0.013                                                          | -0.011   | 0.037 | -0.004                                              | -0.026   | 0.018 |

\* Obtained with 1,000 bias-corrected and accelerated (BCa) bootstrap resamples.

§ Costs were adjusted for age, BMI classification, menopause status, and frequency of symptoms. QALYs were additionally adjusted for baseline quality of life, inpatient stays, employment status, change in the use of antidepressants, and change in symptoms' frequency.
